# Supplementary material for: A Non-Obese Hyperglycemic Mouse Model that Develops after Birth with Low Birthweight
Source: MDPI journal article supplement (doi:10.3390/biomedicines10071642), 2022-07-08
Supplement: s1 [file s1]

Supplementary Table S3. Results of comparative analyses

| ID     | Metabolite                   | PubChem CID | HMDB ID                                  | Concentration (nmol/g) |       |       |         |       |       |         |      |         |      | Comparative Analysis |                      |
|--------|------------------------------|-------------|------------------------------------------|------------------------|-------|-------|---------|-------|-------|---------|------|---------|------|----------------------|----------------------|
|        |                              |             |                                          | Group I                |       |       | Group C |       |       | Group I |      | Group C |      | Group I vs Group C   |                      |
|        |                              |             |                                          | I1                     | I2    | I3    | C5      | C6    | C7    | Mean    | S.D. | Mean    | S.D. | Ratio <sup>†</sup>   | p-value <sup>‡</sup> |
| A_0007 | 2-Hydroxybutyric acid        | 440864      | HMDB00000008                             | 23                     | N.D.  | 42    | 68      | 74    | 27    | 32      | 14   | 56      | 26   | 0.6                  | 0.267                |
| A_0021 | 2-Oxoglutaric acid           | 51          | HMDB00000028                             | N.D.                   | N.D.  | N.D.  | N.D.    | N.D.  | N.D.  | N.A.    | N.A. | N.A.    | N.A. | N.A.                 | N.A.                 |
| A_0009 | 2-Oxosuccinic acid           | 49          | HMDB00000019                             | N.D.                   | N.D.  | N.D.  | N.D.    | N.D.  | N.D.  | N.A.    | N.A. | N.A.    | N.A. | N.A.                 | N.A.                 |
| A_0041 | 2-Phosphoglyceric acid       | 439278      | HMDB00003391                             | N.D.                   | N.D.  | N.D.  | N.D.    | N.D.  | N.D.  | N.A.    | N.A. | N.A.    | N.A. | N.A.                 | N.A.                 |
| A_0006 | 3-Hydroxybutyric acid        | 441         | HMDB00000011, HMDB00000357, HMDB00000442 | 240                    | 322   | 413   | 727     | 1,008 | 499   | 325     | 87   | 744     | 255  | 0.4                  | 0.092                |
| A_0040 | 3-Phosphoglyceric acid       | 439183      | HMDB00000807                             | N.D.                   | N.D.  | 28    | 17      | 28    | 28    | 28      | N.A. | 25      | 6.3  | 1.1                  | N.A.                 |
| A_0077 | 6-Phosphogluconic acid       | 91493       | HMDB00013116                             | 110                    | 99    | 81    | 37      | 48    | 44    | 97      | 15   | 43      | 5.6  | 2.2                  | 0.015                |
| A_0104 | Acetyl CoA_divalent          | 444493      |                                          | N.D.                   | N.D.  | N.D.  | N.D.    | N.D.  | N.D.  | N.A.    | N.A. | N.A.    | N.A. | N.A.                 | N.A.                 |
| C_0071 | Adenine                      | 190         | HMDB00000034                             | 8.1                    | 7.1   | 6.9   | 7.2     | 6.8   | 11    | 7.4     | 0.8  | 8.3     | 2.2  | 0.9                  | 0.537                |
| C_0169 | Adenosine                    | 60961       | HMDB00000050                             | 69                     | 49    | 47    | 63      | 83    | 73    | 55      | 12   | 73      | 10   | 0.8                  | 0.123                |
| A_0109 | ADP                          | 6022        | HMDB0001341                              | 106                    | 99    | 115   | 141     | 146   | 99    | 107     | 7.9  | 129     | 26   | 0.8                  | 0.278                |
| C_0012 | Ala                          | 602         | HMDB00000161, HMDB0001310                | 2,722                  | 2,240 | 2,372 | 1,435   | 1,167 | 1,651 | 2,445   | 249  | 1,418   | 243  | 1.7                  | 0.007                |
| A_0093 | AMP                          | 6083        | HMDB00000045                             | 788                    | 748   | 889   | 894     | 791   | 331   | 808     | 72   | 672     | 299  | 1.2                  | 0.516                |
| C_0075 | Anthranilic acid             | 227         | HMDB00011123                             | N.D.                   | N.D.  | 0.4   | 0.3     | 0.3   | 0.4   | 0.4     | N.A. | 0.3     | 0.07 | 1.2                  | N.A.                 |
| C_0112 | Arg                          | 6322        | HMDB00000517, HMDB00003416               | 8.7                    | 7.6   | 5.8   | 3.5     | 2.8   | 2.9   | 7.4     | 1.4  | 3.1     | 0.4  | 2.4                  | 0.030                |
| C_0066 | Asn                          | 236         | HMDB00000168, HMDB00033780               | 230                    | 215   | 246   | 200     | 168   | 142   | 230     | 16   | 170     | 29   | 1.4                  | 0.050                |
| C_0070 | Asp                          | 424         | HMDB00000191, HMDB0006483                | 576                    | 592   | 519   | 366     | 473   | 413   | 562     | 38   | 417     | 54   | 1.3                  | 0.023                |
| A_0119 | ATP                          | 5967        | HMDB00000538                             | 15                     | 18    | 16    | 28      | 37    | 40    | 16      | 1.6  | 35      | 6.5  | 0.5                  | 0.031                |
| C_0037 | Betaine                      | 247         | HMDB00000043                             | 1,077                  | 948   | 1,092 | 1,155   | 1,520 | 1,624 | 1,039   | 79   | 1,433   | 247  | 0.7                  | 0.098                |
| C_0044 | Betaine aldehyde_+H2O        | 249         |                                          | 52                     | 53    | 64    | 64      | 99    | 84    | 56      | 7.1  | 82      | 17   | 0.7                  | 0.107                |
| A_0088 | cAMP                         | 6076        | HMDB00000058                             | N.D.                   | N.D.  | N.D.  | N.D.    | N.D.  | N.D.  | N.A.    | N.A. | N.A.    | N.A. | N.A.                 | N.A.                 |
| C_0144 | Carnosine                    | 439224      | HMDB00000033                             | 0.4                    | 0.8   | 0.6   | 0.8     | 0.5   | 1.0   | 0.6     | 0.2  | 0.8     | 0.3  | 0.8                  | 0.451                |
| A_0102 | CDP                          | 6132        | HMDB0001546                              | N.D.                   | N.D.  | N.D.  | N.D.    | N.D.  | N.D.  | N.A.    | N.A. | N.A.    | N.A. | N.A.                 | N.A.                 |
| A_0092 | cGMP                         | 24316       | HMDB00013114                             | N.D.                   | N.D.  | N.D.  | N.D.    | N.D.  | N.D.  | N.A.    | N.A. | N.A.    | N.A. | N.A.                 | N.A.                 |
| C_0024 | Choline                      | 305         | HMDB00000097                             | 398                    | 417   | 488   | 581     | 857   | 552   | 434     | 47   | 664     | 168  | 0.7                  | 0.134                |
| A_0034 | cis -Aconitic acid           | 643757      | HMDB00000072                             | N.D.                   | N.D.  | N.D.  | N.D.    | N.D.  | N.D.  | N.A.    | N.A. | N.A.    | N.A. | N.A.                 | N.A.                 |
| A_0049 | Citric acid                  | 311         | HMDB00000094                             | 187                    | 225   | 182   | 137     | 148   | 187   | 198     | 24   | 157     | 26   | 1.3                  | 0.118                |
| C_0114 | Citrulline                   | 9750        | HMDB00009094                             | 33                     | 30    | 34    | 36      | 40    | 41    | 32      | 1.8  | 39      | 2.7  | 0.8                  | 0.028                |
| A_0085 | CMP                          | 6131        | HMDB00000095                             | 78                     | 60    | 64    | 70      | 78    | 69    | 68      | 9.4  | 73      | 4.8  | 0.9                  | 0.474                |
| A_0098 | CoA_divalent                 | 87642       |                                          | 105                    | 98    | 130   | 142     | 143   | 117   | 111     | 17   | 134     | 15   | 0.8                  | 0.147                |
| C_0063 | Creatine                     | 586         | HMDB00000064                             | 193                    | 165   | 244   | 211     | 152   | 230   | 201     | 40   | 198     | 41   | 1.0                  | 0.931                |
| C_0032 | Creatinine                   | 588         | HMDB00000562                             | 4.4                    | 4.3   | 5.5   | 5.4     | 4.3   | 5.9   | 4.7     | 0.7  | 5.2     | 0.8  | 0.9                  | 0.471                |
| A_0115 | CTP                          | 6176        | HMDB00000082                             | N.D.                   | N.D.  | N.D.  | N.D.    | N.D.  | N.D.  | N.A.    | N.A. | N.A.    | N.A. | N.A.                 | N.A.                 |
| C_0046 | Cys                          | 594         | HMDB00000574, HMDB0003417                | 8.3                    | 7.8   | 7.5   | 3.8     | 2.6   | 1.4   | 7.9     | 0.4  | 2.6     | 1.2  | 3.0                  | 0.011                |
| C_0152 | Cytidine                     | 6175        | HMDB00000089                             | 6.8                    | 4.4   | 4.9   | 6.6     | 8.2   | 11    | 5.4     | 1.2  | 8.8     | 2.5  | 0.6                  | 0.125                |
| C_0029 | Cytosine                     | 597         | HMDB00000630                             | 0.6                    | 0.5   | 0.5   | N.D.    | N.D.  | N.D.  | 0.5     | 0.08 | N.A.    | N.A. | 1<                   | N.A.                 |
| A_0118 | dATP                         | 15993       | HMDB0001532                              | N.D.                   | N.D.  | N.D.  | N.D.    | N.D.  | N.D.  | N.A.    | N.A. | N.A.    | N.A. | N.A.                 | N.A.                 |
| A_0113 | dCTP                         | 65091       | HMDB00009098                             | N.D.                   | N.D.  | N.D.  | N.D.    | N.D.  | N.D.  | N.A.    | N.A. | N.A.    | N.A. | N.A.                 | N.A.                 |
| A_0029 | Dihydroxyacetone phosphate   | 668         | HMDB0001473                              | 698                    | 522   | 436   | 134     | 189   | 150   | 552     | 133  | 158     | 28   | 3.5                  | 0.032                |
| A_0101 | dTDP                         | 164628      | HMDB0001274                              | N.D.                   | N.D.  | N.D.  | N.D.    | N.D.  | N.D.  | N.A.    | N.A. | N.A.    | N.A. | N.A.                 | N.A.                 |
| A_0084 | dTMP                         | 9700        | HMDB0001227                              | N.D.                   | N.D.  | N.D.  | N.D.    | N.D.  | N.D.  | N.A.    | N.A. | N.A.    | N.A. | N.A.                 | N.A.                 |
| A_0114 | dTTP                         | 64968       | HMDB0001342                              | N.D.                   | N.D.  | N.D.  | N.D.    | N.D.  | N.D.  | N.A.    | N.A. | N.A.    | N.A. | N.A.                 | N.A.                 |
| A_0056 | Erythrose 4-phosphate        | 122357      | HMDB0001321                              | N.D.                   | N.D.  | N.D.  | N.D.    | N.D.  | N.D.  | N.A.    | N.A. | N.A.    | N.A. | N.A.                 | N.A.                 |
| A_0091 | Fructose 1,6-diphosphate     | 172313      | HMDB0001058                              | 412                    | 313   | 257   | 30      | 20    | 42    | 327     | 78   | 31      | 11   | 11                   | 0.021                |
| A_0074 | Fructose 6-phosphate         | 603         | HMDB00000124                             | 419                    | 95    | 59    | 80      | 98    | 116   | 191     | 198  | 98      | 18   | 1.9                  | 0.503                |
| A_0008 | Fumaric acid                 | 444972      | HMDB00000134                             | 860                    | 792   | 835   | 261     | 331   | 332   | 829     | 34   | 308     | 41   | 2.7                  | 8.9E-05 ***          |
| C_0020 | GABA                         | 119         | HMDB00000112                             | 38                     | 41    | 49    | 24      | 27    | 18    | 43      | 5.5  | 23      | 4.5  | 1.9                  | 0.009                |
| A_0110 | GDP                          | 8977        | HMDB0001201                              | 21                     | 21    | 26    | 24      | 25    | 20    | 23      | 2.8  | 23      | 2.3  | 1.0                  | 0.875                |
| C_0086 | Gln                          | 738         | HMDB00000641, HMDB0003423                | 2,245                  | 2,531 | 2,173 | 1,737   | 1,667 | 1,272 | 2,316   | 189  | 1,559   | 251  | 1.5                  | 0.016                |
| C_0089 | Glu                          | 611         | HMDB00000148, HMDB0003339                | 1,662                  | 1,528 | 1,422 | 1,735   | 2,099 | 1,743 | 1,537   | 120  | 1,859   | 208  | 0.8                  | 0.098                |
| A_0055 | Gluconic acid                | 10690       | HMDB00000625                             | 629                    | 483   | 602   | 1,014   | 1,045 | 734   | 571     | 78   | 931     | 172  | 0.6                  | 0.051                |
| A_0073 | Glucose 1-phosphate          | 65533       | HMDB0001586                              | 222                    | 106   | 72    | 25      | 20    | 25    | 133     | 79   | 23      | 3.2  | 5.7                  | 0.136                |
| A_0071 | Glucose 6-phosphate          | 5958        | HMDB0001401                              | 1,726                  | 234   | 126   | 149     | 163   | 155   | 695     | 894  | 156     | 6.9  | 4.5                  | 0.405                |
| C_0183 | Glutathione (GSH)            | 124886      | HMDB00000125                             | 4,479                  | 3,705 | 3,391 | 2,212   | 2,224 | 2,287 | 3,858   | 560  | 2,241   | 40   | 1.7                  | 0.037                |
| C_0182 | Glutathione (GSSG)_divalent  | 65359       |                                          | 671                    | 563   | 540   | 540     | 571   | 574   | 591     | 70   | 561     | 19   | 1.1                  | 0.543                |
| C_0060 | Gly                          | 759         | HMDB00000123                             | 1,980                  | 1,679 | 1,781 | 1,396   | 1,404 | 1,388 | 1,814   | 153  | 1,396   | 7.7  | 1.3                  | 0.042                |
| A_0030 | Glycerinaldehyde 3-phosphate | 729         | HMDB0001112                              | 36                     | N.D.  | N.D.  | N.D.    | N.D.  | N.D.  | 36      | N.A. | N.A.    | N.A. | 1<                   | N.A.                 |
| A_0031 | Glycerol 3-phosphate         | 439162      | HMDB0000126                              | 2,125                  | 2,306 | 2,255 | 1,994   | 2,526 | 1,990 | 2,229   | 93   | 2,170   | 308  | 1.0                  | 0.778                |
| A_0002 | Glycolic acid                | 757         | HMDB00000115                             | N.D.                   | N.D.  | N.D.  | N.D.    | N.D.  | N.D.  | N.A.    | N.A. | N.A.    | N.A. | N.A.                 | N.A.                 |
| A_0001 | Glyoxylic acid               | 790         | HMDB00000119                             | N.D.                   | N.D.  | N.D.  | N.D.    | N.D.  | N.D.  | N.A.    | N.A. | N.A.    | N.A. | N.A.                 | N.A.                 |
| A_0096 | GMP                          | 6894        | HMDB0001397                              | 245                    | 230   | 300   | 281     | 276   | 116   | 259     | 37   | 225     | 94   | 1.2                  | 0.806                |
| A_0121 | GTP                          | 6830        | HMDB0001273                              | N.D.                   | N.D.  | N.D.  | 7.1     | 12    | 14    | N.A.    | N.A. | 11      | 3.8  | <1                   | N.A.                 |
| C_0092 | Guanine                      | 764         | HMDB00000132                             | 2.9                    | 2.7   | 3.3   | 3.3     | 5.3   | 5.6   | 3.0     | 0.3  | 4.7     | 1.2  | 0.6                  | 0.130                |
| C_0175 | Guanosine                    | 6802        | HMDB00000133                             | 57                     | 47    | 46    | 51      | 66    | 82    | 50      | 6.3  | 66      | 16   | 0.8                  | 0.199                |
| C_0096 | His                          | 773         | HMDB00000177                             | 693                    | 644   | 618   | 571     | 556   | 535   | 652     | 38   | 554     | 18   | 1.2                  | 0.031                |
| C_0042 | Homoserine                   | 12847       | HMDB00000719                             | 2.1                    | 1.8   | 2.2   | 0.8     | 1.0   | 1.4   | 2.0     | 0.2  | 1.1     | 0.3  | 1.9                  | 0.014                |
| C_0061 | Hydroxyproline               | 5810        | HMDB00000725                             | 22                     | 19    | 24    | 9.6     | 10    | 16    | 22      | 2.3  | 12      | 3.3  | 1.8                  | 0.017                |
| C_0072 | Hypoxanthine                 | 790         | HMDB00000157                             | 821                    | 721   | 792   | 821     | 972   | 1,175 | 778     | 52   | 989     | 178  | 0.8                  | 0.168                |
| C_0064 | Ile                          | 791         | HMDB00000172                             | 280                    | 283   | 317   | 317     | 319   | 239   | 293     | 20   | 292     | 46   | 1.0                  | 0.956                |
| A_0095 | IMP                          | 8582        | HMDB00000175                             | 217                    | 207   | 216   | 262     | 252   | 61    | 214     | 5.8  | 191     | 113  | 1.1                  | 0.767                |
| C_0170 | Inosine                      | 6021        | HMDB00000195                             | 2,078                  | 1,789 | 1,834 | 1,708   | 1,856 | 2,241 | 1,901   | 155  | 1,935   | 275  | 1.0                  | 0.862                |
| A_0047 | Isoelectric acid             | 1198        | HMDB00000193                             | N.D.                   | N.D.  | N.D.  | N.D.    | N.D.  | N.D.  | N.A.    | N.A. | N.A.    | N.A. | N.A.                 | N.A.                 |
| A_0005 | Lactic acid                  |             |                                          |                        |       |       |         |       |       |         |      |         |      |                      |                      |
