# Supplementary material for: A Non-Obese Hyperglycemic Mouse Model that Develops after Birth with Low Birthweight
Source: MDPI journal article supplement (doi:10.3390/biomedicines10071642), 2022-07-08
Supplement: s1 [file s1]

## Supplementary Table S1. Principal component score

| Contribution rate (%) |       | Group I |        |        | Group C |       |        |
|-----------------------|-------|---------|--------|--------|---------|-------|--------|
|                       |       | I1      | I2     | I3     | C1      | C2    | C3     |
| PC1                   | 41.99 | -12.09  | -11.01 | -7.41  | 9.73    | 11.66 | 9.12   |
| PC2                   | 18.80 | -4.70   | -0.08  | 6.81   | 7.68    | 2.58  | -12.28 |
| PC3                   | 15.49 | 8.01    | 0.62   | -10.21 | 2.82    | 4.72  | -5.97  |
| PC4                   | 13.40 | -6.54   | 10.96  | -5.23  | 2.57    | -2.39 | 0.63   |
| PC5                   | 10.32 | -2.56   | 2.77   | 0.94   | -8.02   | 8.60  | -1.73  |

PC, principal component
