# Supplementary material for: A Non-Obese Hyperglycemic Mouse Model that Develops after Birth with Low Birthweight
Source: MDPI journal article supplement (doi:10.3390/biomedicines10071642), 2022-07-08
Supplement: s1 [file s1]

Supplementary Table S2. Metabolites and principal component score

|        | Compound name                         | PubChem CID              | HMDB ID                                             | m/z     | MT/RT | PC1      | PC2      |
|--------|---------------------------------------|--------------------------|-----------------------------------------------------|---------|-------|----------|----------|
| A_0003 | Pyruvic acid                          | <a href="#">1060</a>     | <a href="#">HMDB0000243</a>                         | 87.009  | 10.49 | 9.9E-01  | -2.2E-02 |
| A_0004 | Butyric acid                          | <a href="#">264</a>      | <a href="#">HMDB0000039</a>                         | 87.045  | 8.31  | -3.2E-01 | 4.4E-01  |
|        | Isobutyric acid                       | <a href="#">6590</a>     | <a href="#">HMDB0001873</a>                         |         |       |          |          |
| A_0005 | Lactic acid                           | <a href="#">612</a>      | <a href="#">HMDB0000190.HMDB0001311</a>             | 89.024  | 9.00  | -9.5E-01 | 1.3E-01  |
| A_0006 | 3-Hydroxybutyric acid                 | <a href="#">441</a>      | <a href="#">HMDB0000011.HMDB0000357.HMDB0000442</a> | 103.039 | 8.04  | 8.6E-01  | 3.4E-01  |
| A_0007 | 2-Hydroxybutyric acid                 | <a href="#">440864</a>   | <a href="#">HMDB0000008</a>                         | 103.040 | 8.24  | 7.4E-01  | 5.3E-01  |
| A_0008 | Fumaric acid                          | <a href="#">444972</a>   | <a href="#">HMDB0000134</a>                         | 115.003 | 17.57 | -9.8E-01 | 3.3E-02  |
| A_0010 | Succinic acid                         | <a href="#">1110</a>     | <a href="#">HMDB0000254</a>                         | 117.019 | 15.52 | -5.5E-01 | 4.3E-01  |
| A_0011 | $\beta$ -Hydroxyisovaleric acid       | <a href="#">69362</a>    | <a href="#">HMDB0000754</a>                         | 117.056 | 7.63  | 2.3E-01  | 1.3E-01  |
| A_0012 | XA0003                                |                          |                                                     | 124.991 | 10.24 | -5.3E-01 | -7.9E-01 |
| A_0013 | Isethionic acid                       | <a href="#">7866</a>     | <a href="#">HMDB0003903</a>                         | 124.991 | 9.55  | 8.1E-01  | 2.2E-01  |
| A_0014 | 5-Oxoproline                          | <a href="#">7405</a>     | <a href="#">HMDB0000267</a>                         | 128.035 | 7.97  | 9.1E-01  | -1.1E-01 |
| A_0015 | <i>N</i> -Acetylaniline               | <a href="#">88064</a>    | <a href="#">HMDB0000766</a>                         | 130.051 | 7.50  | -7.9E-01 | 4.2E-01  |
| A_0016 | Malic acid                            | <a href="#">525</a>      | <a href="#">HMDB0000156.HMDB0000744</a>             | 133.013 | 15.73 | -9.9E-01 | 3.5E-02  |
| A_0017 | Threonic acid                         | <a href="#">5460407</a>  | <a href="#">HMDB0000943</a>                         | 135.030 | 7.79  | 4.7E-01  | 4.2E-01  |
| A_0018 | Ethanolamine phosphate                | <a href="#">1015</a>     | <a href="#">HMDB0000224</a>                         | 140.011 | 6.79  | 8.9E-01  | 4.0E-01  |
| A_0019 | Octanoic acid                         | <a href="#">379</a>      | <a href="#">HMDB0000482</a>                         | 143.107 | 7.11  | 4.2E-01  | 5.0E-01  |
| A_0020 | 4-Acetamidobutanoic acid              | <a href="#">18189</a>    | <a href="#">HMDB0003681</a>                         | 144.066 | 7.29  | 5.1E-01  | 1.7E-01  |
| A_0022 | 2-Hydroxyglutaric acid                | <a href="#">43</a>       | <a href="#">HMDB0000606.HMDB0000694</a>             | 147.029 | 13.32 | -8.6E-01 | -2.6E-01 |
| A_0023 | Cysteinesulfinic acid                 | <a href="#">1549098</a>  | <a href="#">HMDB0000996</a>                         | 152.000 | 8.01  | 9.0E-01  | -2.9E-01 |
| A_0024 | Pelargonic acid                       | <a href="#">8158</a>     | <a href="#">HMDB0000847</a>                         | 157.123 | 6.93  | 2.6E-01  | 5.3E-01  |
| A_0025 | Terephthalic acid                     | <a href="#">7489</a>     | <a href="#">HMDB0002428</a>                         | 165.018 | 13.08 | -4.1E-01 | -2.7E-01 |
| A_0026 | XA0012                                |                          |                                                     | 166.018 | 7.89  | 4.2E-01  | -4.0E-01 |
| A_0027 | Phosphoenolpyruvic acid               | <a href="#">1005</a>     | <a href="#">HMDB0000263</a>                         | 166.974 | 15.58 | 6.7E-01  | -5.9E-01 |
| A_0028 | Uric acid                             | <a href="#">1175</a>     | <a href="#">HMDB0000289</a>                         | 167.021 | 7.50  | 6.8E-01  | 6.7E-01  |
| A_0029 | Dihydroxyacetone phosphate            | <a href="#">668</a>      | <a href="#">HMDB0001473</a>                         | 168.990 | 10.43 | -9.6E-01 | -7.7E-02 |
| A_0030 | Glyceraldehyde 3-phosphate            | <a href="#">729</a>      | <a href="#">HMDB0001112</a>                         | 168.991 | 9.66  | -5.3E-01 | -3.0E-01 |
| A_0031 | Glycerol 3-phosphate                  | <a href="#">439162</a>   | <a href="#">HMDB0000126</a>                         | 171.006 | 10.00 | -6.8E-02 | 3.3E-01  |
| A_0032 | Decanoic acid                         | <a href="#">2969</a>     | <a href="#">HMDB0000511</a>                         | 171.140 | 6.77  | 2.9E-01  | -1.2E-01 |
| A_0033 | Isovalerylalanine                     | <a href="#">129285</a>   | <a href="#">HMDB0000747</a>                         | 172.097 | 6.80  | -3.8E-01 | -6.1E-02 |
|        | <i>N</i> -Acetyllecucine              | <a href="#">70912</a>    | <a href="#">HMDB0011756</a>                         |         |       |          |          |
| A_0035 | <i>N</i> -Acetylaspargine             | <a href="#">99715</a>    | <a href="#">HMDB00006028</a>                        | 173.057 | 7.11  | 1.6E-01  | 5.2E-01  |
| A_0036 | Suberic acid                          | <a href="#">10457</a>    | <a href="#">HMDB0000893</a>                         | 173.084 | 10.57 | -3.0E-01 | 3.7E-01  |
| A_0037 | <i>N</i> -Acetylaspatic acid          | <a href="#">65065</a>    | <a href="#">HMDB0000812</a>                         | 174.041 | 11.76 | -9.1E-02 | 6.9E-01  |
| A_0038 | Ascorbic acid                         | <a href="#">54670067</a> | <a href="#">HMDB0000044</a>                         | 175.024 | 7.18  | -3.3E-02 | 7.0E-01  |
| A_0039 | Allantoic acid                        | <a href="#">203</a>      | <a href="#">HMDB0001209</a>                         | 175.046 | 7.33  | -1.3E-01 | -4.2E-01 |
| A_0040 | 3-Phosphoglyceric acid                | <a href="#">439183</a>   | <a href="#">HMDB0000807</a>                         | 184.984 | 14.82 | 7.1E-01  | 9.6E-02  |
| A_0042 | XA0017                                |                          |                                                     | 186.114 | 6.68  | 6.0E-01  | -7.0E-03 |
| A_0043 | <i>N</i> -Acetylglutamine             | <a href="#">25561</a>    | <a href="#">HMDB00006029</a>                        | 187.073 | 6.86  | -7.9E-01 | 5.7E-02  |
| A_0044 | Azelaic acid                          | <a href="#">2266</a>     | <a href="#">HMDB0000784</a>                         | 187.097 | 10.07 | -2.9E-01 | 4.3E-01  |
| A_0045 | <i>N</i> -Acetylglutamic acid         | <a href="#">70914</a>    | <a href="#">HMDB0001138</a>                         | 188.056 | 10.82 | -3.4E-01 | -3.1E-01 |
| A_0046 | <i>N</i> -Acetylmethionine            | <a href="#">448580</a>   | <a href="#">HMDB0011745</a>                         | 190.055 | 6.89  | -9.1E-01 | 1.6E-01  |
| A_0048 | XA0019                                |                          |                                                     | 191.019 | 7.05  | 9.1E-01  | 1.5E-01  |
| A_0049 | Citric acid                           | <a href="#">311</a>      | <a href="#">HMDB0000094</a>                         | 191.020 | 17.85 | -7.4E-01 | -4.4E-01 |
| A_0050 | Quinic acid                           | <a href="#">6508</a>     | <a href="#">HMDB0003072</a>                         | 191.065 | 6.55  | -3.0E-02 | -1.4E-01 |
| A_0051 | <i>N</i> -( <i>o</i> -Toluoyl)glycine | <a href="#">91637</a>    | <a href="#">HMDB0011723</a>                         | 192.065 | 6.91  | 6.1E-01  | -7.2E-01 |
| A_0052 | Phenaceturic acid                     | <a href="#">68144</a>    | <a href="#">HMDB0000821</a>                         | 192.066 | 6.97  | -4.2E-01 | -4.9E-01 |
| A_0053 | Galacturonic acid-1                   | <a href="#">439215</a>   | <a href="#">HMDB00002545</a>                        | 193.035 | 7.01  | -4.7E-01 | -5.2E-01 |
|        | Glucuronic acid-1                     | <a href="#">94715</a>    | <a href="#">HMDB0000127</a>                         |         |       |          |          |
| A_0054 | Galacturonic acid-2                   | <a href="#">439215</a>   | <a href="#">HMDB00002545</a>                        | 193.036 | 6.87  | 4.6E-01  | -2.5E-02 |
|        | Glucuronic acid-2                     | <a href="#">94715</a>    | <a href="#">HMDB0000127</a>                         |         |       |          |          |
| A_0055 | Gluconic acid                         | <a href="#">10690</a>    | <a href="#">HMDB0000625</a>                         | 195.050 | 6.96  | 8.8E-01  | 3.0E-01  |
| A_0057 | Lauric acid                           | <a href="#">3893</a>     | <a href="#">HMDB0000638</a>                         | 199.171 | 6.53  | 7.6E-01  | 4.5E-01  |
| A_0058 | Mucic acid                            | <a href="#">3037582</a>  | <a href="#">HMDB0000639</a>                         | 209.029 | 11.41 | 1.4E-01  | -2.1E-01 |
| A_0059 | 3-Indoxylsulfuric acid                | <a href="#">10258</a>    | <a href="#">HMDB0000682</a>                         | 212.001 | 8.01  | -9.7E-01 | 1.7E-01  |
| A_0060 | Pantothenic acid                      | <a href="#">6613</a>     | <a href="#">HMDB0000210</a>                         | 218.102 | 6.52  | 6.0E-01  | -1.8E-01 |
| A_0061 | Ethyl glucuronide                     | <a href="#">18392195</a> | <a href="#">HMDB0010325</a>                         | 221.066 | 6.61  | 4.7E-01  | -8.5E-01 |
| A_0062 | Myristoleic acid                      | <a href="#">5281119</a>  | <a href="#">HMDB0002000</a>                         | 225.185 | 6.38  | 7.5E-01  | 6.0E-01  |
| A_0063 | Myristic acid                         | <a href="#">11005</a>    | <a href="#">HMDB0000806</a>                         | 227.202 | 6.36  | 2.9E-02  | 7.1E-01  |
| A_0064 | Ribulose 5-phosphate                  | <a href="#">439184</a>   | <a href="#">HMDB0000618</a>                         | 229.012 | 9.14  | -9.3E-01 | -7.3E-02 |
| A_0065 | Ribose 5-phosphate                    | <a href="#">439167</a>   | <a href="#">HMDB0001548</a>                         | 229.012 | 8.80  | -8.2E-01 | -7.7E-03 |
| A_0066 | XA0033                                |                          |                                                     | 242.080 | 6.47  | 9.5E-02  | -2.6E-01 |
| A_0067 | Ascorbate 2-sulfate                   | <a href="#">54676864</a> |                                                     | 254.982 | 11.59 | -7.8E-01 | 4.0E-01  |
| A_0068 | XA0035                                |                          |                                                     | 254.983 | 11.08 | -9.0E-01 | 1.7E-01  |
| A_0069 | Glucosamine 6-phosphate               | <a href="#">440997</a>   | <a href="#">HMDB0001254</a>                         | 258.038 | 7.49  | -5.3E-01 | -3.0E-01 |
| A_0070 | <i>myo</i> -Inositol 2-phosphate      | <a href="#">160886</a>   |                                                     | 259.022 | 8.80  | -5.4E-01 | 3.3E-01  |
| A_0071 | Glucose 6-phosphate                   | <a href="#">5958</a>     | <a href="#">HMDB0001401</a>                         | 259.023 | 8.26  | -5.4E-01 | -3.2E-01 |

|        |                                         |                          |                                         |         |       |          |          |
|--------|-----------------------------------------|--------------------------|-----------------------------------------|---------|-------|----------|----------|
| A_0072 | <i>myo</i> -Inositol 1-phosphate        | <a href="#">107737</a>   | <a href="#">HMDB0000213</a>             | 259.023 | 8.61  | 4.8E-01  | 4.6E-01  |
|        | <i>myo</i> -Inositol 3-phosphate        | <a href="#">440194</a>   | <a href="#">HMDB00006814</a>            |         |       |          |          |
| A_0073 | Glucose 1-phosphate                     | <a href="#">65533</a>    | <a href="#">HMDB0001586</a>             | 259.023 | 8.48  | -8.3E-01 | -2.1E-01 |
| A_0074 | Fructose 6-phosphate                    | <a href="#">603</a>      | <a href="#">HMDB0000124</a>             | 259.023 | 8.34  | -4.7E-01 | -4.1E-01 |
| A_0075 | Sorbitol 6-phosphate                    | <a href="#">152306</a>   | <a href="#">HMDB0005831</a>             | 261.037 | 8.36  | 1.5E-01  | 4.8E-01  |
| A_0076 | 2,3-Diphosphoglyceric acid              | <a href="#">186004</a>   | <a href="#">HMDB0001294</a>             | 264.953 | 14.19 | 8.0E-01  | 2.1E-01  |
| A_0077 | 6-Phosphogluconic acid                  | <a href="#">91493</a>    | <a href="#">HMDB0001316</a>             | 275.019 | 11.83 | -9.7E-01 | -9.1E-02 |
| A_0078 | Xanthosine                              | <a href="#">64959</a>    | <a href="#">HMDB0000299</a>             | 283.070 | 6.47  | -2.9E-01 | 8.3E-01  |
| A_0079 | Sedoheptulose 7-phosphate               | <a href="#">165007</a>   | <a href="#">HMDB0001068</a>             | 289.034 | 8.08  | 2.9E-01  | -4.4E-01 |
| A_0080 | <i>N</i> -Acetylglucosamine 1-phosphate | <a href="#">440272</a>   | <a href="#">HMDB0001367</a>             | 300.047 | 8.03  | 7.2E-01  | 2.6E-01  |
| A_0081 | <i>N</i> -Acetylglucosamine 6-phosphate | <a href="#">440996</a>   | <a href="#">HMDB0001062</a>             | 300.048 | 7.72  | -3.8E-01 | -4.0E-01 |
| A_0082 | <i>N</i> -Acetylneuraminic acid         | <a href="#">439197</a>   | <a href="#">HMDB0000230</a>             | 308.100 | 6.14  | 3.4E-01  | 2.8E-01  |
| A_0083 | Ribulose 1,5-diphosphate                | <a href="#">123658</a>   |                                         | 308.979 | 12.45 | 5.6E-01  | 3.6E-01  |
| A_0085 | CMP                                     | <a href="#">6131</a>     | <a href="#">HMDB0000095</a>             | 322.043 | 8.04  | 3.5E-01  | -1.6E-01 |
| A_0086 | UMP                                     | <a href="#">6030</a>     | <a href="#">HMDB0000288</a>             | 323.030 | 8.18  | -7.5E-03 | 9.1E-01  |
| A_0087 | <i>N</i> -Glycolylneuraminic acid       | <a href="#">440001</a>   | <a href="#">HMDB0000833</a>             | 324.095 | 6.12  | -7.9E-01 | 1.1E-01  |
| A_0089 | 5-Aminoimidazole-4-carboxamide ribotide | <a href="#">65110</a>    | <a href="#">HMDB0001517</a>             | 337.055 | 7.93  | 6.9E-01  | 3.9E-01  |
| A_0090 | Ascorbate 2-glucoside                   | <a href="#">54693473</a> |                                         | 337.075 | 6.09  | -9.3E-01 | 3.6E-02  |
| A_0091 | Fructose 1,6-diphosphate                | <a href="#">172313</a>   | <a href="#">HMDB0001058</a>             | 338.989 | 11.73 | -9.8E-01 | -7.0E-02 |
| A_0093 | AMP                                     | <a href="#">6083</a>     | <a href="#">HMDB0000045</a>             | 346.056 | 7.78  | -2.9E-01 | 9.0E-01  |
| A_0094 | 3'-AMP                                  | <a href="#">41211</a>    | <a href="#">HMDB0003540</a>             | 346.058 | 8.16  | -9.3E-01 | -1.1E-01 |
| A_0095 | IMP                                     | <a href="#">8582</a>     | <a href="#">HMDB0000175</a>             | 347.042 | 7.98  | -1.2E-01 | 8.5E-01  |
| A_0096 | GMP                                     | <a href="#">6804</a>     | <a href="#">HMDB0001397</a>             | 362.052 | 7.68  | -1.9E-01 | 9.2E-01  |
| A_0097 | XA0055                                  |                          |                                         | 368.999 | 11.56 | -7.7E-01 | -2.8E-01 |
| A_0098 | CoA_divalent                            | <a href="#">87642</a>    | <a href="#">HMDB0001423</a>             | 382.549 | 8.82  | 7.6E-01  | 5.6E-01  |
| A_0099 | PRPP                                    | <a href="#">7339</a>     | <a href="#">HMDB0000280</a>             | 388.945 | 13.08 | 5.1E-01  | 1.7E-01  |
| A_0100 | FAD_divalent                            | <a href="#">643975</a>   | <a href="#">HMDB0001248</a>             | 391.571 | 6.67  | 3.1E-01  | 6.6E-01  |
| A_0103 | UDP                                     | <a href="#">6031</a>     | <a href="#">HMDB0000295</a>             | 402.991 | 9.57  | 3.1E-01  | -2.2E-01 |
| A_0105 | Cholic acid                             | <a href="#">221493</a>   | <a href="#">HMDB0000619</a>             | 407.279 | 5.87  | -8.1E-01 | 2.6E-01  |
| A_0106 | Thiamine diphosphate                    | <a href="#">1132</a>     | <a href="#">HMDB0001372</a>             | 423.031 | 6.73  | 5.5E-01  | -2.8E-01 |
| A_0107 | 3-Methylcrotonyl CoA_divalent           | <a href="#">9549326</a>  | <a href="#">HMDB0001493</a>             | 423.570 | 8.60  | -2.7E-01 | 3.8E-01  |
| A_0109 | ADP                                     | <a href="#">6022</a>     | <a href="#">HMDB0001341</a>             | 426.025 | 9.01  | 6.4E-01  | 6.6E-01  |
| A_0110 | GDP                                     | <a href="#">8977</a>     | <a href="#">HMDB0001201</a>             | 442.015 | 8.81  | 2.2E-01  | 8.5E-01  |
| A_0111 | XA0065                                  |                          |                                         | 445.054 | 5.92  | 2.4E-01  | 7.7E-01  |
| A_0112 | Adenylosuccinic acid                    | <a href="#">447145</a>   | <a href="#">HMDB0000536</a>             | 462.069 | 11.15 | -9.6E-01 | 2.2E-01  |
| A_0117 | CDP-choline                             | <a href="#">13804</a>    | <a href="#">HMDB0001413</a>             | 487.100 | 5.80  | 4.7E-01  | 7.3E-01  |
| A_0119 | ATP                                     | <a href="#">5957</a>     | <a href="#">HMDB0000538</a>             | 505.987 | 9.64  | 9.2E-01  | -3.4E-01 |
| A_0120 | ITP                                     | <a href="#">8583</a>     | <a href="#">HMDB0000189</a>             | 506.972 | 9.65  | 5.5E-01  | 7.3E-01  |
| A_0121 | GTP                                     | <a href="#">6830</a>     | <a href="#">HMDB0001273</a>             | 521.976 | 9.42  | 9.2E-01  | -3.6E-01 |
| A_0122 | ADP-ribose                              | <a href="#">445794</a>   | <a href="#">HMDB0001178</a>             | 558.068 | 7.18  | -8.8E-01 | 2.8E-01  |
| A_0123 | UDP-galactose                           | <a href="#">23724458</a> | <a href="#">HMDB0000302</a>             | 565.044 | 7.28  | -9.7E-01 | 9.7E-02  |
|        | UDP-glucose                             | <a href="#">8629</a>     | <a href="#">HMDB0000286</a>             |         |       |          |          |
| A_0124 | UDP-glucuronic acid                     | <a href="#">17473</a>    | <a href="#">HMDB0000935</a>             | 579.030 | 9.15  | 8.0E-01  | 1.1E-01  |
| A_0125 | GDP-fucose                              | <a href="#">10918995</a> | <a href="#">HMDB0001095</a>             | 588.075 | 7.02  | -4.5E-01 | 5.0E-01  |
|        | ADP-glucose                             | <a href="#">16500</a>    | <a href="#">HMDB0006557</a>             |         |       |          |          |
| A_0126 | UDP- <i>N</i> -acetylgalactosamine      | <a href="#">23724461</a> | <a href="#">HMDB0000304</a>             | 606.069 | 7.13  | -9.6E-01 | -2.7E-02 |
|        | UDP- <i>N</i> -acetylglucosamine        | <a href="#">445675</a>   | <a href="#">HMDB0000290</a>             |         |       |          |          |
| A_0127 | CMP- <i>N</i> -acetylneuraminate        | <a href="#">448209</a>   | <a href="#">HMDB0001176</a>             | 613.143 | 7.03  | -5.7E-01 | -5.5E-01 |
| A_0128 | NAD <sup>+</sup>                        | <a href="#">5893</a>     | <a href="#">HMDB0000902</a>             | 662.105 | 5.59  | 9.6E-01  | 2.7E-01  |
| A_0129 | NADH                                    | <a href="#">439153</a>   | <a href="#">HMDB0001487</a>             | 664.111 | 6.91  | 9.1E-01  | -1.3E-01 |
| A_0130 | NADP <sup>+</sup>                       | <a href="#">5886</a>     | <a href="#">HMDB0000217</a>             | 742.067 | 7.85  | 8.8E-01  | 1.8E-01  |
| C_0001 | Trimethylamine                          | <a href="#">1146</a>     | <a href="#">HMDB0000906</a>             | 60.081  | 4.82  | -8.7E-01 | -3.0E-01 |
| C_0002 | Urea                                    | <a href="#">1176</a>     | <a href="#">HMDB0000294</a>             | 61.040  | 17.31 | -7.4E-02 | -3.6E-01 |
| C_0003 | Ethanolamine                            | <a href="#">700</a>      | <a href="#">HMDB0000149</a>             | 62.061  | 5.20  | 9.0E-01  | 2.5E-01  |
| C_0004 | XC0001                                  |                          |                                         | 72.081  | 5.21  | -9.9E-01 | -7.8E-02 |
| C_0005 | Aminoacetone                            | <a href="#">215</a>      | <a href="#">HMDB0002134</a>             | 74.060  | 5.60  | -2.0E-01 | 1.9E-02  |
| C_0006 | Gly                                     | <a href="#">750</a>      | <a href="#">HMDB0000123</a>             | 76.040  | 6.80  | -9.3E-01 | -2.8E-03 |
| C_0007 | Isopropanolamine                        | <a href="#">4</a>        | <a href="#">HMDB0012136</a>             | 76.075  | 5.71  | -4.8E-01 | -5.2E-03 |
| C_0008 | Trimethylamine <i>N</i> -oxide          | <a href="#">1145</a>     | <a href="#">HMDB0000925</a>             | 76.076  | 5.40  | -9.3E-01 | 5.4E-02  |
| C_0009 | Putrescine                              | <a href="#">1045</a>     | <a href="#">HMDB0001414</a>             | 89.108  | 3.87  | -3.3E-02 | 6.2E-01  |
| C_0010 | β-Ala                                   | <a href="#">239</a>      | <a href="#">HMDB0000056</a>             | 90.055  | 5.98  | 9.6E-01  | 1.2E-01  |
| C_0011 | Sarcosine                               | <a href="#">1088</a>     | <a href="#">HMDB0000271</a>             | 90.055  | 7.75  | 5.8E-01  | 3.5E-01  |
| C_0012 | Ala                                     | <a href="#">602</a>      | <a href="#">HMDB0000161.HMDB0001310</a> | 90.055  | 7.35  | -9.5E-01 | -1.4E-01 |
| C_0013 | Dimethylaminoethanol                    | <a href="#">7902</a>     | <a href="#">HMDB0032231</a>             | 90.092  | 5.64  | -2.3E-01 | 2.2E-01  |
| C_0014 | Glycerol                                | <a href="#">753</a>      | <a href="#">HMDB0000131</a>             | 93.055  | 18.05 | 5.5E-01  | -4.1E-01 |
| C_0015 | Phenol                                  | <a href="#">996</a>      | <a href="#">HMDB0000228</a>             | 95.048  | 4.41  | 5.3E-01  | -5.8E-01 |
| C_0016 | Homoserinelactone                       | <a href="#">73509</a>    |                                         | 102.055 | 5.77  | 3.0E-01  | 9.1E-02  |
| C_0017 | Azetidine 2-carboxylic acid             | <a href="#">16486</a>    |                                         | 102.055 | 9.40  | -4.8E-01 | -5.2E-03 |
| C_0018 | Hexylamine                              | <a href="#">8102</a>     |                                         | 102.127 | 6.18  | -8.0E-01 | 3.6E-01  |
| C_0019 | 3-Aminoisobutyric acid                  | <a href="#">64956</a>    | <a href="#">HMDB0003911</a>             | 104.071 | 6.40  | -9.3E-01 | -2.5E-01 |
| C_0020 | GABA                                    | <a href="#">119</a>      | <a href="#">HMDB0000112</a>             | 104.071 | 6.27  | -8.6E-01 | 4.1E-01  |

|        |                                           |                          |                                                     |         |       |          |          |
|--------|-------------------------------------------|--------------------------|-----------------------------------------------------|---------|-------|----------|----------|
| C_0021 | 3-Aminobutyric acid                       | <a href="#">10932</a>    |                                                     | 104.071 | 6.48  | 7.7E-01  | -5.7E-01 |
| C_0022 | 2-Aminoisobutyric acid                    | <a href="#">6119</a>     | <a href="#">HMDB0001906</a>                         | 104.071 | 7.84  | -5.0E-01 | 3.0E-01  |
|        | 2-Aminobutyric acid                       | <a href="#">6657</a>     | <a href="#">HMDB0000452</a>                         |         |       |          |          |
| C_0023 | <i>N,N</i> -Dimethylglycine               | <a href="#">673</a>      | <a href="#">HMDB0000092</a>                         | 104.071 | 8.91  | 2.8E-01  | 3.7E-01  |
| C_0024 | Choline                                   | <a href="#">305</a>      | <a href="#">HMDB0000097</a>                         | 104.107 | 5.58  | 8.1E-01  | 2.1E-01  |
| C_0025 | 2,3-Diaminopropionic acid                 | <a href="#">364</a>      | <a href="#">HMDB0002006</a>                         | 105.067 | 5.86  | -7.9E-01 | -2.3E-01 |
| C_0026 | Ser                                       | <a href="#">617</a>      | <a href="#">HMDB0000187.HMDB0003406</a>             | 106.050 | 8.17  | -8.7E-01 | -2.8E-01 |
| C_0027 | Diethanolamine                            | <a href="#">8113</a>     | <a href="#">HMDB0004437</a>                         | 106.087 | 6.23  | 6.0E-02  | 2.8E-01  |
| C_0028 | Hypotaurine                               | <a href="#">107812</a>   | <a href="#">HMDB0000965</a>                         | 110.027 | 14.56 | -5.1E-01 | -7.5E-01 |
| C_0029 | Cytosine                                  | <a href="#">597</a>      | <a href="#">HMDB0000630</a>                         | 112.052 | 5.92  | -9.9E-01 | 2.3E-02  |
| C_0030 | Histamine                                 | <a href="#">774</a>      | <a href="#">HMDB0000870</a>                         | 112.088 | 3.94  | 4.2E-01  | 5.0E-01  |
| C_0031 | Uracil                                    | <a href="#">1174</a>     | <a href="#">HMDB0000300</a>                         | 113.035 | 18.10 | 3.9E-01  | -7.4E-01 |
| C_0032 | Creatinine                                | <a href="#">588</a>      | <a href="#">HMDB0000562</a>                         | 114.067 | 5.94  | 3.9E-01  | -1.4E-01 |
| C_0033 | 3-Amino-2-piperidone                      | <a href="#">5200225</a>  | <a href="#">HMDB0000323</a>                         | 115.086 | 6.20  | -3.2E-01 | 4.4E-01  |
| C_0034 | Pro                                       | <a href="#">614</a>      | <a href="#">HMDB0000162.HMDB0003411</a>             | 116.071 | 8.79  | 1.4E-01  | 3.4E-01  |
| C_0035 | Guanidoacetic acid                        | <a href="#">763</a>      | <a href="#">HMDB0000128</a>                         | 118.062 | 6.72  | -5.5E-01 | 5.8E-01  |
| C_0036 | Val                                       | <a href="#">1182</a>     | <a href="#">HMDB0000883</a>                         | 118.087 | 8.13  | 3.0E-01  | 9.1E-01  |
| C_0037 | Betaine                                   | <a href="#">247</a>      | <a href="#">HMDB0000043</a>                         | 118.087 | 9.17  | 8.0E-01  | -4.8E-01 |
| C_0038 | 5-Aminovaleric acid                       | <a href="#">138</a>      | <a href="#">HMDB0003355</a>                         | 118.087 | 6.52  | -9.6E-01 | 6.5E-02  |
| C_0039 | 2,4-Diaminobutyric acid                   | <a href="#">134490</a>   | <a href="#">HMDB0006284</a>                         | 119.082 | 5.65  | -9.4E-01 | -9.5E-02 |
| C_0040 | 4-Amino-3-hydroxybutyric acid             | <a href="#">2149</a>     |                                                     | 120.064 | 6.61  | -5.5E-01 | -2.1E-01 |
| C_0041 | Thr                                       | <a href="#">6288</a>     | <a href="#">HMDB0000167</a>                         | 120.066 | 8.57  | -7.9E-01 | 1.2E-01  |
| C_0042 | Homoserine                                | <a href="#">12647</a>    | <a href="#">HMDB0000719</a>                         | 120.066 | 8.22  | -8.9E-01 | -1.5E-01 |
| C_0043 | 2-Methylserine                            | <a href="#">439656</a>   |                                                     | 120.067 | 8.45  | -7.6E-01 | -3.6E-01 |
| C_0044 | Betaine aldehyde_+H <sub>2</sub> O        | <a href="#">249</a>      | <a href="#">HMDB0001252</a>                         | 120.103 | 6.06  | 8.2E-01  | -1.4E-01 |
| C_0045 | Anserine_divalent                         | <a href="#">112072</a>   | <a href="#">HMDB0000194</a>                         | 121.069 | 5.56  | -4.6E-01 | 3.5E-01  |
| C_0046 | Cys                                       | <a href="#">594</a>      | <a href="#">HMDB0000574.HMDB0003417</a>             | 122.028 | 9.22  | -9.6E-01 | 2.7E-01  |
| C_0047 | 2-Amino-2-(hydroxymethyl)-1,3-propanediol | <a href="#">6503</a>     |                                                     | 122.082 | 6.74  | -6.6E-01 | -1.0E-01 |
| C_0048 | Nicotinamide                              | <a href="#">936</a>      | <a href="#">HMDB0001406</a>                         | 123.056 | 6.04  | -6.4E-01 | -3.8E-01 |
| C_0049 | Nicotinic acid                            | <a href="#">938</a>      | <a href="#">HMDB0001488</a>                         | 124.040 | 8.19  | -3.1E-01 | -6.8E-01 |
| C_0050 | Picolinic acid                            | <a href="#">1018</a>     | <a href="#">HMDB0002243</a>                         | 124.040 | 15.28 | 3.3E-01  | -6.5E-01 |
| C_0051 | Taurine                                   | <a href="#">1123</a>     | <a href="#">HMDB0000251</a>                         | 126.022 | 18.03 | 8.9E-01  | 2.2E-01  |
| C_0052 | 1-Methylhistamine                         | <a href="#">3614</a>     | <a href="#">HMDB0000898</a>                         | 126.103 | 4.04  | 3.7E-01  | 4.9E-01  |
| C_0053 | 3-Hydroxy-2-methyl-4-pyrone               | <a href="#">8369</a>     | <a href="#">HMDB0030776</a>                         | 127.038 | 18.07 | -9.9E-01 | -6.0E-02 |
| C_0055 | Imidazole-4-acetic acid                   | <a href="#">96215</a>    | <a href="#">HMDB0002024</a>                         | 127.051 | 6.54  | -1.5E-01 | -1.6E-01 |
| C_0056 | XC0016                                    |                          |                                                     | 129.067 | 7.13  | -7.1E-01 | 3.2E-01  |
| C_0057 | 4-Oxopyrrolidine-2-carboxylic acid        | <a href="#">107541</a>   |                                                     | 130.050 | 8.92  | 6.1E-01  | 3.0E-02  |
| C_0058 | Pipecolic acid                            | <a href="#">439227</a>   | <a href="#">HMDB0000070.HMDB0000716.HMDB0005960</a> | 130.087 | 8.34  | -5.8E-01 | -5.8E-01 |
| C_0059 | <i>trans</i> -Glutaconic acid             | <a href="#">5280498</a>  | <a href="#">HMDB0000620</a>                         | 131.034 | 18.78 | -7.2E-01 | 2.8E-01  |
| C_0060 | <i>cis</i> -4-Hydroxyproline              | <a href="#">440014</a>   | <a href="#">HMDB0006055</a>                         | 132.066 | 8.97  | 5.8E-01  | -5.8E-01 |
| C_0061 | Hydroxyproline                            | <a href="#">5810</a>     | <a href="#">HMDB0000725</a>                         | 132.067 | 9.79  | -8.9E-01 | -1.6E-01 |
| C_0062 | 3-Guanidinopropionic acid                 | <a href="#">67701</a>    |                                                     | 132.077 | 6.53  | -9.0E-01 | -1.9E-01 |
| C_0063 | Creatine                                  | <a href="#">586</a>      | <a href="#">HMDB0000064</a>                         | 132.078 | 7.20  | -1.8E-02 | -5.5E-02 |
| C_0064 | Ile                                       | <a href="#">791</a>      | <a href="#">HMDB0000172</a>                         | 132.102 | 8.28  | 7.4E-02  | 9.5E-01  |
| C_0065 | Leu                                       | <a href="#">857</a>      | <a href="#">HMDB0000687</a>                         | 132.102 | 8.37  | 1.6E-01  | 9.4E-01  |
| C_0066 | Asn                                       | <a href="#">236</a>      | <a href="#">HMDB0000168.HMDB0033780</a>             | 133.061 | 8.58  | -8.0E-01 | 5.4E-01  |
| C_0067 | Gly-Gly                                   | <a href="#">11163</a>    | <a href="#">HMDB0011733</a>                         | 133.062 | 6.80  | 6.6E-01  | 7.0E-01  |
| C_0068 | Ornithine                                 | <a href="#">389</a>      | <a href="#">HMDB0000214.HMDB0003374</a>             | 133.098 | 5.55  | 6.6E-01  | -5.2E-01 |
| C_0069 | Thiaproline                               | <a href="#">9934</a>     |                                                     | 134.028 | 11.38 | 4.0E-01  | 6.9E-01  |
| C_0070 | Asp                                       | <a href="#">424</a>      | <a href="#">HMDB0000191.HMDB0006483</a>             | 134.045 | 9.47  | -8.9E-01 | -7.9E-02 |
| C_0071 | Adenine                                   | <a href="#">190</a>      | <a href="#">HMDB0000034</a>                         | 136.063 | 6.22  | 2.6E-01  | -8.8E-01 |
| C_0072 | Hypoxanthine                              | <a href="#">790</a>      | <a href="#">HMDB0000157</a>                         | 137.047 | 9.27  | 6.8E-01  | -6.7E-01 |
| C_0073 | 1-Methylnicotinamide                      | <a href="#">457</a>      | <a href="#">HMDB0000699</a>                         | 137.072 | 5.99  | -8.1E-01 | 4.9E-01  |
| C_0074 | Trigonelline                              | <a href="#">5570</a>     | <a href="#">HMDB0000875</a>                         | 138.056 | 8.53  | -5.7E-01 | -2.3E-01 |
| C_0075 | Anthranilic acid                          | <a href="#">227</a>      | <a href="#">HMDB0001123</a>                         | 138.056 | 8.87  | 6.7E-01  | 7.2E-02  |
| C_0077 | γ-Glu-Lys_divalent                        | <a href="#">65254</a>    | <a href="#">HMDB0029154</a>                         | 138.581 | 6.99  | -1.5E-01 | 6.8E-02  |
| C_0078 | Urocanic acid                             | <a href="#">736715</a>   | <a href="#">HMDB0000301</a>                         | 139.051 | 6.76  | -7.5E-02 | 5.9E-01  |
| C_0079 | 1-Methyl-4-imidazoleacetic acid           | <a href="#">75810</a>    | <a href="#">HMDB0002820</a>                         | 141.066 | 6.71  | -8.5E-02 | -2.9E-01 |
| C_0080 | 1 <i>H</i> -Imidazole-4-propionic acid    | <a href="#">10105257</a> |                                                     | 141.067 | 6.61  | -7.4E-01 | -9.0E-02 |
| C_0081 | Ectoine                                   | <a href="#">126041</a>   |                                                     | 143.082 | 7.65  | 5.4E-02  | -3.6E-01 |
| C_0082 | XC0029                                    | <a href="#">0</a>        |                                                     | 144.102 | 9.32  | 3.8E-01  | -4.6E-02 |
|        | Stachydrine                               | <a href="#">115244</a>   | <a href="#">HMDB0004827</a>                         |         |       |          |          |
| C_0083 | 4-Guanidinobutyric acid                   | <a href="#">500</a>      | <a href="#">HMDB0003464</a>                         | 146.093 | 6.75  | -7.2E-01 | 7.1E-02  |
| C_0084 | γ-Butyrobetaine                           | <a href="#">134</a>      | <a href="#">HMDB0001161</a>                         | 146.118 | 6.60  | -9.4E-01 | -6.9E-02 |
| C_0085 | Spermidine                                | <a href="#">1102</a>     | <a href="#">HMDB0001257</a>                         | 146.166 | 3.72  | -4.7E-01 | -2.5E-01 |
| C_0086 | Gln                                       | <a href="#">738</a>      | <a href="#">HMDB0000641.HMDB0003423</a>             | 147.077 | 8.76  | -8.9E-01 | 3.5E-01  |
| C_0087 | Lys                                       | <a href="#">866</a>      | <a href="#">HMDB0000182.HMDB0003405</a>             | 147.113 | 5.60  | -2.8E-01 | 5.7E-02  |
| C_0088 | Isoglutamic acid                          | <a href="#">73064</a>    |                                                     | 148.061 | 7.45  | 8.4E-01  | -2.6E-01 |
| C_0089 | Glu                                       | <a href="#">611</a>      | <a href="#">HMDB0000148.HMDB0003339</a>             | 148.061 | 8.92  | 7.5E-01  | -1.1E-01 |
| C_0090 | <i>threo</i> -β-Methylaspartic acid       | <a href="#">440064</a>   |                                                     | 148.062 | 10.05 | -1.1E-01 | 1.7E-02  |
| C_0091 | Met                                       | <a href="#">876</a>      | <a href="#">HMDB0000696</a>                         | 150.059 | 8.73  | 7.5E-01  | 1.2E-01  |

|        |                                                                                             |                                                                           |                                                                                           |         |       |          |          |
|--------|---------------------------------------------------------------------------------------------|---------------------------------------------------------------------------|-------------------------------------------------------------------------------------------|---------|-------|----------|----------|
| C_0092 | Guanine                                                                                     | <a href="#">764</a>                                                       | <a href="#">HMDB0000132</a>                                                               | 152.059 | 6.79  | 7.8E-01  | -4.6E-01 |
| C_0093 | Xanthine                                                                                    | <a href="#">1188</a>                                                      | <a href="#">HMDB0000292</a>                                                               | 153.042 | 16.04 | 9.4E-01  | 2.0E-01  |
| C_0094 | <i>N</i> <sup>1</sup> -Methyl-4-pyridone-5-carboxamide                                      | <a href="#">440810</a>                                                    | <a href="#">HMDB0004194</a>                                                               | 153.066 | 15.08 | 2.6E-01  | 6.2E-01  |
| C_0095 | 4-(β-Acetylaminoethyl)imidazole                                                             | <a href="#">69602</a>                                                     |                                                                                           | 154.097 | 6.85  | 1.4E-01  | 3.8E-01  |
| C_0096 | His                                                                                         | <a href="#">773</a>                                                       | <a href="#">HMDB0000177</a>                                                               | 156.078 | 5.95  | -9.3E-01 | 6.5E-02  |
| C_0097 | Imidazolelactic acid                                                                        | <a href="#">793</a>                                                       |                                                                                           | 157.061 | 7.18  | -5.1E-01 | 2.5E-01  |
| C_0098 | XC0145<br>Ala-Ala                                                                           | <a href="#">15331</a><br><a href="#">5460362</a>                          | <a href="#">HMDB0003459</a>                                                               | 161.093 | 7.52  | -6.4E-01 | 5.4E-01  |
| C_0099 | Tryptamine                                                                                  | <a href="#">1150</a>                                                      | <a href="#">HMDB0000303</a>                                                               | 161.106 | 6.76  | 4.0E-01  | -8.0E-01 |
| C_0100 | <i>N</i> <sup>6</sup> -Methyllysine                                                         | <a href="#">164795</a>                                                    | <a href="#">HMDB0002038</a>                                                               | 161.129 | 5.79  | -9.4E-01 | -1.0E-01 |
| C_0101 | O -Acetylhomoserine<br>2-Aminoadipic acid                                                   | <a href="#">439389</a><br><a href="#">92136</a>                           | <a href="#">HMDB0000510</a>                                                               | 162.077 | 8.92  | 1.6E-01  | 2.1E-01  |
| C_0102 | Carnitine                                                                                   | <a href="#">85</a>                                                        | <a href="#">HMDB0000062</a>                                                               | 162.113 | 6.92  | -1.0E-01 | -9.6E-01 |
| C_0103 | 5-Hydroxylysine                                                                             | <a href="#">3032849</a>                                                   | <a href="#">HMDB0000450</a>                                                               | 163.109 | 5.83  | 1.4E-01  | 5.4E-01  |
| C_0104 | Pterin                                                                                      | <a href="#">73000</a>                                                     | <a href="#">HMDB0000802</a>                                                               | 164.057 | 8.49  | 8.6E-01  | 1.5E-01  |
| C_0105 | Phe                                                                                         | <a href="#">994</a>                                                       | <a href="#">HMDB0000159</a>                                                               | 166.087 | 9.00  | 2.4E-02  | 7.7E-01  |
| C_0106 | Tyr-Arg_divalent                                                                            | <a href="#">123804</a>                                                    |                                                                                           | 169.595 | 6.27  | 5.1E-01  | 4.8E-01  |
| C_0107 | 1-Methylhistidine<br>3-Methylhistidine                                                      | <a href="#">92105</a><br><a href="#">64969</a>                            | <a href="#">HMDB0000001</a><br><a href="#">HMDB0000479</a>                                | 170.094 | 6.12  | -7.3E-01 | -1.1E-01 |
| C_0108 | XC0147                                                                                      | <a href="#">4173</a>                                                      |                                                                                           | 172.072 | 7.85  | 4.9E-01  | 5.5E-01  |
| C_0109 | XC0040                                                                                      |                                                                           |                                                                                           | 174.088 | 9.79  | -1.2E-01 | -7.8E-01 |
| C_0110 | <i>N</i> <sup>5</sup> -Ethylglutamine                                                       | <a href="#">439378</a>                                                    |                                                                                           | 175.109 | 9.24  | -7.6E-01 | -8.6E-02 |
| C_0111 | <i>N</i> -Acetylmethionine                                                                  | <a href="#">439232</a>                                                    | <a href="#">HMDB0003357</a>                                                               | 175.109 | 7.73  | -1.4E-01 | 4.9E-01  |
| C_0112 | Arg                                                                                         | <a href="#">6322</a>                                                      | <a href="#">HMDB0000517</a> , <a href="#">HMDB0003416</a>                                 | 175.120 | 5.81  | -9.7E-01 | -4.4E-02 |
| C_0113 | Guanidinosuccinic acid                                                                      | <a href="#">439918</a>                                                    | <a href="#">HMDB0003157</a>                                                               | 176.068 | 8.23  | -9.7E-01 | 1.1E-01  |
| C_0114 | Citrulline                                                                                  | <a href="#">9750</a>                                                      | <a href="#">HMDB0000904</a>                                                               | 176.104 | 8.99  | 8.8E-01  | -3.6E-01 |
| C_0115 | Serotonin                                                                                   | <a href="#">5202</a>                                                      | <a href="#">HMDB0000259</a>                                                               | 177.103 | 7.13  | 3.9E-01  | -2.0E-01 |
| C_0116 | Gluconolactone                                                                              | <a href="#">7027</a>                                                      | <a href="#">HMDB0000150</a>                                                               | 179.056 | 18.76 | 8.8E-01  | 3.2E-01  |
| C_0117 | Glucosamine                                                                                 | <a href="#">439213</a>                                                    | <a href="#">HMDB0001514</a>                                                               | 180.088 | 7.54  | -9.2E-01 | -3.2E-01 |
| C_0118 | Tyr                                                                                         | <a href="#">1153</a>                                                      | <a href="#">HMDB0000158</a>                                                               | 182.082 | 9.22  | -5.9E-01 | 6.5E-01  |
| C_0119 | Phosphorylcholine                                                                           | <a href="#">1014</a>                                                      | <a href="#">HMDB0001565</a>                                                               | 184.074 | 16.66 | -4.3E-01 | -3.6E-01 |
| C_0120 | <i>N</i> <sup>1</sup> -Acetylspermidine                                                     | <a href="#">496</a>                                                       | <a href="#">HMDB0001276</a>                                                               | 188.177 | 5.16  | -4.1E-01 | 2.4E-01  |
| C_0121 | Gly-Leu                                                                                     |                                                                           |                                                                                           | 189.124 | 7.83  | 3.9E-01  | 7.3E-01  |
| C_0122 | <i>N</i> -Acetyllysine                                                                      | <a href="#">92907</a>                                                     | <a href="#">HMDB0000446</a>                                                               | 189.125 | 7.93  | -2.6E-01 | 4.1E-01  |
| C_0123 | <i>N</i> <sup>6</sup> -Acetyllysine                                                         | <a href="#">92832</a>                                                     | <a href="#">HMDB0000206</a>                                                               | 189.125 | 9.29  | 5.0E-01  | -2.3E-01 |
| C_0124 | <i>N</i> <sub>ω</sub> -Methylarginine                                                       | <a href="#">132862</a>                                                    |                                                                                           | 189.136 | 6.07  | -3.5E-01 | -4.0E-01 |
| C_0125 | <i>N</i> <sup>6</sup> , <i>N</i> <sup>6</sup> , <i>N</i> <sup>6</sup> -Trimethyllysine      | <a href="#">440120</a>                                                    | <a href="#">HMDB0001325</a>                                                               | 189.159 | 5.86  | 8.3E-01  | 1.6E-01  |
| C_0126 | Homocitrulline                                                                              | <a href="#">65072</a>                                                     | <a href="#">HMDB0000679</a>                                                               | 190.120 | 9.08  | -8.8E-01 | 2.4E-01  |
| C_0127 | Gly-Asp                                                                                     | <a href="#">97363</a>                                                     |                                                                                           | 191.067 | 8.04  | -4.4E-01 | 8.0E-01  |
| C_0128 | 2,6-Diaminopimelic acid                                                                     | <a href="#">439283</a>                                                    | <a href="#">HMDB0001370</a>                                                               | 191.103 | 7.24  | -3.7E-01 | -5.7E-01 |
| C_0129 | <i>N</i> -Acetylhistidine                                                                   | <a href="#">75619</a>                                                     |                                                                                           | 198.089 | 7.97  | -7.3E-01 | 1.3E-01  |
| C_0130 | 11-Aminoundecanoic acid                                                                     | <a href="#">17083</a>                                                     |                                                                                           | 202.182 | 7.81  | 4.9E-01  | 7.7E-01  |
| C_0131 | SDMA                                                                                        | <a href="#">169148</a>                                                    | <a href="#">HMDB0003334</a>                                                               | 203.151 | 6.35  | 8.1E-01  | -4.0E-01 |
| C_0132 | ADMA                                                                                        | <a href="#">123831</a>                                                    | <a href="#">HMDB0001539</a>                                                               | 203.151 | 6.24  | 2.0E-01  | -9.2E-01 |
| C_0133 | Spermine                                                                                    | <a href="#">1103</a>                                                      | <a href="#">HMDB0001256</a>                                                               | 203.225 | 3.67  | 9.7E-01  | -1.4E-01 |
| C_0134 | O -Acetylcarnitine                                                                          | <a href="#">439756</a>                                                    | <a href="#">HMDB0000201</a>                                                               | 204.124 | 7.33  | -9.3E-02 | -7.5E-01 |
| C_0135 | γ-Glu-Gly                                                                                   | <a href="#">165527</a>                                                    | <a href="#">HMDB0011667</a>                                                               | 205.083 | 9.81  | -9.6E-01 | -1.4E-01 |
| C_0136 | Trp                                                                                         | <a href="#">1148</a>                                                      | <a href="#">HMDB0000929</a>                                                               | 205.098 | 8.95  | -7.5E-01 | 4.7E-01  |
| C_0137 | Carboxymethyllysine                                                                         | <a href="#">123800</a>                                                    |                                                                                           | 205.120 | 7.52  | 9.3E-01  | 1.5E-01  |
| C_0138 | Kynurenine                                                                                  | <a href="#">846</a>                                                       | <a href="#">HMDB0000684</a>                                                               | 209.094 | 8.17  | 1.5E-01  | 7.9E-02  |
| C_0139 | Propionylcarnitine<br>XC0061                                                                | <a href="#">188824</a><br><a href="#">0</a>                               | <a href="#">HMDB0000824</a>                                                               | 218.140 | 7.57  | 4.4E-01  | -6.0E-01 |
| C_0140 | β-Ala-Lys                                                                                   | <a href="#">440638</a>                                                    |                                                                                           | 218.151 | 5.54  | -8.2E-01 | 4.5E-01  |
| C_0141 | XC0065                                                                                      |                                                                           |                                                                                           | 221.093 | 10.63 | -6.3E-01 | -4.3E-01 |
| C_0142 | <i>N</i> -Acetylglucosylamine                                                               | <a href="#">439454</a>                                                    | <a href="#">HMDB0001104</a>                                                               | 221.114 | 8.05  | 8.7E-01  | -2.6E-01 |
| C_0143 | <i>N</i> -Acetylgalactosamine<br><i>N</i> -Acetylglucosamine<br><i>N</i> -Acetylmannosamine | <a href="#">35717</a><br><a href="#">439174</a><br><a href="#">439281</a> | <a href="#">HMDB0000853</a><br><a href="#">HMDB0000215</a><br><a href="#">HMDB0001129</a> | 222.099 | 18.09 | 1.4E-01  | -6.7E-01 |
| C_0144 | Carnosine                                                                                   | <a href="#">439224</a>                                                    | <a href="#">HMDB0000033</a>                                                               | 227.115 | 5.51  | 3.3E-01  | -4.1E-01 |
| C_0145 | Ergothioneine                                                                               | <a href="#">3037043</a>                                                   | <a href="#">HMDB0003045</a>                                                               | 230.097 | 14.04 | 7.8E-01  | -4.5E-01 |
| C_0146 | Butyrylcarnitine                                                                            | <a href="#">439829</a>                                                    | <a href="#">HMDB0002013</a>                                                               | 232.156 | 7.77  | -4.4E-01 | 3.9E-01  |
| C_0147 | Ser-Glu                                                                                     |                                                                           |                                                                                           | 235.094 | 8.43  | -7.1E-01 | 4.6E-01  |
| C_0148 | γ-Glu-Ser                                                                                   | <a href="#">22844748</a>                                                  | <a href="#">HMDB0029158</a>                                                               | 235.094 | 10.25 | -7.8E-01 | 1.3E-01  |
| C_0149 | Thr-Asp                                                                                     | <a href="#">3280446</a>                                                   |                                                                                           | 235.095 | 8.61  | -6.4E-01 | 5.1E-01  |
| C_0150 | 7,8-Dihydrobiopterin                                                                        | <a href="#">119055</a>                                                    | <a href="#">HMDB0000038</a>                                                               | 240.110 | 8.96  | 2.8E-01  | -5.1E-02 |
| C_0151 | Thymidine                                                                                   | <a href="#">5789</a>                                                      | <a href="#">HMDB0000273</a>                                                               | 243.098 | 18.18 | -7.1E-01 | 1.7E-01  |
| C_0152 | Cytidine                                                                                    | <a href="#">6175</a>                                                      | <a href="#">HMDB0000089</a>                                                               | 244.095 | 7.86  | 6.8E-01  | -7.0E-01 |
| C_0153 | Uridine                                                                                     | <a href="#">6029</a>                                                      | <a href="#">HMDB0000296</a>                                                               | 245.078 | 18.11 | -9.3E-01 | -2.6E-01 |
| C_0154 | Isovalerylcarnitine                                                                         | <a href="#">6426851</a>                                                   | <a href="#">HMDB0000688</a>                                                               | 246.170 | 7.87  | 8.4E-01  | 2.8E-01  |
| C_0155 | γ-Glu-Val                                                                                   | <a href="#">7015683</a>                                                   | <a href="#">HMDB0011172</a>                                                               | 247.131 | 10.33 | -1.9E-02 | -6.0E-01 |
| C_0156 | Malonylcarnitine                                                                            | <a href="#">22833583</a>                                                  | <a href="#">HMDB0002095</a>                                                               | 248.114 | 8.28  | 5.7E-01  | 3.0E-01  |

|        |                                 |                           |                             |         |       |          |          |
|--------|---------------------------------|---------------------------|-----------------------------|---------|-------|----------|----------|
| C_0157 | Pyridoxamine 5'-phosphate       | <a href="#">1053</a>      | <a href="#">HMDB0001555</a> | 249.065 | 8.51  | 6.4E-01  | -8.9E-02 |
| C_0158 | γ-Glu-Thr                       | <a href="#">53861142</a>  | <a href="#">HMDB0029159</a> | 249.110 | 10.34 | -1.8E-01 | -8.0E-01 |
| C_0159 | γ-Glu-Cys                       | <a href="#">123938</a>    | <a href="#">HMDB0001049</a> | 251.071 | 10.43 | -7.0E-01 | 5.7E-01  |
| C_0160 | XC0153                          | <a href="#">4725</a>      |                             | 254.123 | 8.45  | -5.5E-01 | 8.1E-01  |
| C_0161 | XC0089                          |                           |                             | 255.100 | 7.72  | 9.2E-01  | -3.2E-01 |
| C_0162 | XC0154                          | <a href="#">3182</a>      |                             | 255.110 | 18.12 | -9.4E-01 | -2.7E-02 |
| C_0163 | Glycerophosphocholine           | <a href="#">439285</a>    | <a href="#">HMDB0000086</a> | 258.112 | 17.68 | -9.2E-01 | -4.1E-02 |
| C_0164 | γ-Glu-Ile                       | <a href="#">22885096</a>  | <a href="#">HMDB0011170</a> | 261.146 | 10.49 | -1.1E-01 | -5.1E-02 |
|        | γ-Glu-Leu                       | <a href="#">151023</a>    | <a href="#">HMDB0011171</a> |         |       |          |          |
| C_0165 | γ-Glu-Asn                       | <a href="#">131801686</a> | <a href="#">HMDB0029144</a> | 262.103 | 10.37 | 4.4E-01  | 5.6E-02  |
| C_0166 | γ-Glu-Ornithine                 | <a href="#">189156</a>    | <a href="#">HMDB0002248</a> | 262.141 | 6.93  | 3.2E-01  | 8.2E-01  |
| C_0167 | γ-Glu-Asp                       | <a href="#">161197</a>    | <a href="#">HMDB0030419</a> | 263.087 | 10.57 | 7.1E-02  | 9.0E-01  |
| C_0168 | Thiamine                        | <a href="#">1130</a>      | <a href="#">HMDB0000235</a> | 265.113 | 5.36  | -9.6E-01 | -1.6E-01 |
| C_0169 | Adenosine                       | <a href="#">60961</a>     | <a href="#">HMDB0000050</a> | 268.105 | 8.03  | 6.6E-01  | -4.0E-01 |
| C_0170 | Inosine                         | <a href="#">6021</a>      | <a href="#">HMDB0000195</a> | 269.089 | 16.01 | 2.5E-02  | -9.3E-01 |
| C_0171 | γ-Glu-Glu                       | <a href="#">92865</a>     | <a href="#">HMDB0011173</a> | 277.105 | 10.66 | 2.7E-01  | -7.9E-01 |
| C_0172 | Glu-Glu                         | <a href="#">439500</a>    |                             | 277.106 | 8.85  | -2.5E-01 | 9.3E-01  |
| C_0173 | Saccharopine                    | <a href="#">160556</a>    | <a href="#">HMDB0000279</a> | 277.141 | 8.74  | 8.7E-01  | 3.1E-01  |
| C_0174 | 1-Methyladenosine               | <a href="#">27476</a>     | <a href="#">HMDB0003331</a> | 282.122 | 8.08  | 5.7E-01  | 4.4E-01  |
| C_0175 | Guanosine                       | <a href="#">6802</a>      | <a href="#">HMDB0000133</a> | 284.101 | 10.31 | 6.0E-01  | -7.7E-01 |
| C_0176 | His-Glu                         | <a href="#">7010583</a>   |                             | 285.121 | 6.16  | -7.8E-01 | 1.5E-01  |
| C_0177 | Ophthalmic acid                 | <a href="#">7018721</a>   | <a href="#">HMDB0005765</a> | 290.135 | 10.73 | -7.1E-01 | -3.4E-01 |
| C_0178 | Argininosuccinic acid           | <a href="#">16950</a>     | <a href="#">HMDB0000052</a> | 291.131 | 7.69  | -9.8E-01 | 1.1E-01  |
| C_0179 | γ-Glu-Phe                       | <a href="#">111299</a>    | <a href="#">HMDB0000594</a> | 295.130 | 10.59 | -3.0E-02 | -6.3E-01 |
| C_0180 | 5'-Deoxy-5'-methylthioadenosine | <a href="#">439176</a>    | <a href="#">HMDB0001173</a> | 298.098 | 8.18  | -5.0E-01 | -2.4E-01 |
| C_0181 | Arg-Glu                         |                           |                             | 304.163 | 6.11  | -7.1E-01 | 3.9E-01  |
| C_0182 | Glutathione (GSSG)_divalent     | <a href="#">65359</a>     | <a href="#">HMDB0003337</a> | 307.085 | 9.91  | -4.2E-01 | -5.2E-01 |
| C_0183 | Glutathione (GSH)               | <a href="#">124886</a>    | <a href="#">HMDB0000125</a> | 308.093 | 10.75 | -9.6E-01 | -1.0E-01 |
| C_0184 | XC0126                          |                           |                             | 310.114 | 12.18 | 5.4E-01  | -2.9E-01 |
| C_0185 | Tyr-Glu                         |                           |                             | 311.125 | 9.03  | -5.8E-01 | 3.7E-01  |
| C_0186 | S-Methylglutathione             | <a href="#">115260</a>    |                             | 322.108 | 10.86 | -9.1E-01 | -4.9E-02 |
| C_0187 | XC0132                          |                           |                             | 325.162 | 7.06  | 3.3E-01  | 9.8E-02  |
| C_0188 | NMN                             | <a href="#">14180</a>     | <a href="#">HMDB0000229</a> | 335.066 | 16.77 | 9.6E-01  | -4.2E-02 |
| C_0189 | Thiamine phosphate              | <a href="#">1131</a>      | <a href="#">HMDB0002666</a> | 345.080 | 8.67  | 6.9E-01  | 3.9E-01  |
| C_0190 | XC0137                          |                           |                             | 350.103 | 10.98 | 2.4E-01  | -4.0E-01 |
| C_0191 | S-Lactoylglutathione            | <a href="#">440018</a>    | <a href="#">HMDB0001066</a> | 380.114 | 11.20 | 7.7E-01  | -4.5E-01 |
| C_0192 | S-Adenosylhomocysteine          | <a href="#">439155</a>    | <a href="#">HMDB0000939</a> | 385.130 | 7.13  | 8.4E-01  | 4.5E-01  |
| C_0193 | S-Adenosylmethionine            | <a href="#">34755</a>     | <a href="#">HMDB0001185</a> | 399.146 | 5.81  | -9.1E-01 | 9.7E-02  |
| C_0194 | Tetrahydrofolic acid            | <a href="#">135444742</a> | <a href="#">HMDB0001846</a> | 446.181 | 9.65  | -1.3E-01 | -4.3E-01 |
| C_0195 | 5-Methyltetrahydrofolic acid    | <a href="#">444412</a>    | <a href="#">HMDB0001396</a> | 460.196 | 9.63  | -5.0E-01 | -1.8E-01 |

MT, migration time; PC, principal component; RT, retention time
